# Supplementary material for: Inactivation of Transcriptional Regulator FabT Influences Colony Phase Variation of Streptococcus pneumoniae
Source: PubMed Central journal article supplement (PMC8406281; doi:10.1128/mbio.01304-21), 2021-08-17
Supplement: mbio.01304-21-st001.pdf [file mbio.01304-21-st001.pdf]

**Table S1 Quantitative assessment of the stability in the colony opacity phenotypes among the D39s derivatives**

| Strain<br>(genotype)           | Opacity<br>phenotype of<br>seeding colony | No. of colonies |             | Percentage of the<br>opaque* |
|--------------------------------|-------------------------------------------|-----------------|-------------|------------------------------|
|                                |                                           | Opaque          | Transparent |                              |
| D39s                           | Opaque                                    | 100             | 0           | 100                          |
|                                |                                           | 100             | 0           |                              |
|                                |                                           | 100             | 0           |                              |
| D39 $\Delta fabT$              | Opaque                                    | 28              | 72          | 19±8                         |
|                                |                                           | 18              | 82          |                              |
|                                |                                           | 12              | 88          |                              |
|                                | Transparent                               | 23              | 77          | 15±7                         |
|                                |                                           | 12              | 88          |                              |
|                                |                                           | 10              | 90          |                              |
| D39C $\Delta fabT$             | Opaque                                    | 100             | 0           | 100                          |
|                                |                                           | 100             | 0           |                              |
|                                |                                           | 100             | 0           |                              |
|                                | Transparent                               | 0               | 100         | 0                            |
|                                |                                           | 0               | 100         |                              |
|                                |                                           | 0               | 100         |                              |
| D39 $\Delta cps$               | Opaque                                    | 100             | 0           | 100                          |
|                                |                                           | 100             | 0           |                              |
|                                |                                           | 100             | 1           |                              |
| D39 $\Delta cps \Delta fabT$   | Opaque                                    | 40              | 160         | 18±3                         |
|                                |                                           | 42              | 158         |                              |
|                                |                                           | 31              | 169         |                              |
|                                | Transparent                               | 28              | 178         | 17±5                         |
|                                |                                           | 45              | 155         |                              |
|                                |                                           | 29              | 171         |                              |
| D39 $\Delta cps C \Delta fabT$ | Opaque                                    | 100             | 0           | 100                          |
|                                |                                           | 98              | 2           |                              |
|                                |                                           | 100             | 0           |                              |

\* The averages ± standard deviations were calculated on the basis of the three duplicate plates.
