# Supplementary material for: Inactivation of Transcriptional Regulator FabT Influences Colony Phase Variation of Streptococcus pneumoniae
Source: PubMed Central journal article supplement (PMC8406281; doi:10.1128/mbio.01304-21), 2021-08-17
Supplement: mbio.01304-21-st002.pdf [file mbio.01304-21-st002.pdf]

**TABLE S2 . Bacterial strains and plasmids used in this study**

| Strain or plasmid                                                 | Description                                                                                     | Reference(s) or source | Primers                |
|-------------------------------------------------------------------|-------------------------------------------------------------------------------------------------|------------------------|------------------------|
| <b>Strains</b>                                                    |                                                                                                 |                        |                        |
| D39                                                               | <i>S. pneumoniae</i> D39 strain, Capsulated strain serotype 2                                   | NCTC                   |                        |
| D39s                                                              | D39; <i>rpsL::rpsL41</i>                                                                        | This study             | Pr1801-1804            |
| D39 $\Delta$ <i>fabT</i> ::JC1                                    | D39s derivative; the <i>fabT</i> region is replaced with JC1                                    | This study             | Pr1910-1914, 1917      |
| D39 $\Delta$ <i>fabT</i>                                          | D39 $\Delta$ <i>fabT</i> ::JC1 derivative; the 1-381 region of <i>fabT</i> is removed           | This study             |                        |
| D39C $\Delta$ <i>fabT</i>                                         | D39 $\Delta$ <i>fabT</i> derivate, pPEPZ-Plac-RBS- <i>fabT</i> -FLAG3                           | This study             |                        |
| D39 $\Delta$ <i>psrA</i>                                          | D39s derivative; p.His7ThrfsTer15                                                               | (27)                   | Pr1975,1994,2008-2013  |
| D39 $\Delta$ <i>fabT</i> $\Delta$ <i>psrA</i>                     | D39 $\Delta$ <i>fabT</i> derivate; p.His7ThrfsTer15                                             | This study             |                        |
| D39 $\Delta$ <i>dexB-cps2A</i> ::JC1                              | D39s derivative, the <i>dexB-cps2A</i> region is replaced with JC1                              | (38)                   | Pr1901-1906            |
| D39 $\Delta$ <i>cps</i>                                           | D39 $\Delta$ <i>dexB-cps2A</i> ::JC1 derivative; the entire <i>dexB-cps2A</i> region is removed | This study             | Pr1907-1908            |
| D39 $\Delta$ <i>cps</i> $\Delta$ <i>fabT</i>                      | D39 $\Delta$ <i>cps</i> derivative; the 1-381 region of <i>fabT</i> is removed                  | This study             |                        |
| D39 $\Delta$ <i>cps</i> C $\Delta$ <i>fabT</i>                    | D39 $\Delta$ <i>cps</i> $\Delta$ <i>fabT</i> derivative; pPEPZ-Plac-RBS- <i>fabT</i> -FLAG3     | This study             |                        |
| D39 $\Delta$ <i>cps</i> $\Delta$ <i>psrA</i>                      | D39 $\Delta$ <i>cps</i> derivative; $\Delta$ <i>psrA</i> His7ThrfsTer15                         | This study             |                        |
| D39 $\Delta$ <i>cps</i> $\Delta$ <i>fabT</i> $\Delta$ <i>psrA</i> | D39 $\Delta$ <i>cps</i> $\Delta$ <i>fabT</i> derivative; $\Delta$ <i>psrA</i> His7ThrfsTer15    | This study             |                        |
| <b>Plasmid</b>                                                    |                                                                                                 |                        |                        |
| pPEPZ-P <sub>lac</sub>                                            | Integrative plasmid with IPTG inducible promoter                                                | (48)                   |                        |
| pPEPZ-Pl <sub>ac</sub> -RBS- <i>fabT</i> -FLAG3                   | Integrative plasmid with IPTG inducible promoter and Flag-tagged <i>fabT</i>                    | This study             | Pr2043/2034, 2035/2044 |
