# Supplementary material for: Inactivation of Transcriptional Regulator FabT Influences Colony Phase Variation of Streptococcus pneumoniae
Source: PubMed Central journal article supplement (PMC8406281; doi:10.1128/mbio.01304-21), 2021-08-17
Supplement: mbio.01304-21-st003.pdf [file mbio.01304-21-st003.pdf]

**Table S3 Primers used in this work.**

| Primer ID | Oligonucleotide sequence (5'-3')               | Description                        |
|-----------|------------------------------------------------|------------------------------------|
| Pr1801    | GAGTGTACAGGGACGTGCTGAC                         | rpsL41- P1                         |
| Pr1802    | GGGCTGAGTTAGGTTTTGTAGGTGTC                     | rpsL41- P2                         |
| Pr1803    | GACACCTACAAAACCTAACTCAGCCC                     | rpsL41- P3                         |
| Pr1804    | GAAGCAGCAGTACCACGTTTACC                        | rpsL41- P4                         |
| Pr1805    | GTTCGTATGCGTCCAGGGAT                           | gyrB F                             |
| Pr1806    | ATACCACGCCCATCATCCAC                           | gyrB R                             |
| Pr1807    | AGGCTCCAGATGTGACTCCA                           | fabT F                             |
| Pr1808    | ACCACACGACGATCCTGTTC                           | fabT R                             |
| Pr1809    | GTGCAGCCAGTATCCCGATT                           | fabH F                             |
| Pr1810    | GTAAGAATGAGCGTGCCCCA                           | fabH R                             |
| Pr1811    | GTCCTGAGGTCGCAAATGGT                           | fabM F                             |
| Pr1812    | GCCCCGCTTCATCTCTACCAA                          | fabM R                             |
| Pr1901    | TTCCTGACGAGAAGGTAGTCAATAA                      | dexB up F                          |
| Pr1902    | AAAGCATAAGGAAAGGGGCCTTATAGTAATTCCACACAGA       | dexB up R                          |
| Pr1903    | GGAGTTTTTCAGCATTATCCTATAGGTGTTAATCATGAGTA      | cps2A dw F                         |
| Pr1904    | GTCTAGATGGACATTCCCTACTGGG                      | cps2A dw R                         |
| Pr1905    | TCTGTGTGGAATTACTATAAGGCCCTTTCCTTATGCTTT        | $\Delta$ cps-Janus Cassette F      |
| Pr1906    | TACTCATGATTAACACCTATAGGATAATGCTGAAACTCC        | $\Delta$ cps-Janus Cassette R      |
| Pr1907    | ACTCATGATTAACACCTATACAAAAGCACCTCAAAAAGGTATTACC | $\Delta$ cps R                     |
| Pr1908    | CCTTTTTGAGGTGCTTTTTGTATAGGTGTTAATCATGAGT       | $\Delta$ cps F                     |
| Pr1910    | GGAGTTTTTCAGCATTATCCTTTTCATATCCCTCCTTC         | fabT up R                          |
| Pr1911    | GAAGGAGGGATATGAAAAGGATAATGCTGAAACTCC           | $\Delta$ fabT-Janus Cassette F     |
| Pr1912    | GTCAAGCCTTTACCCATGACCCTTTCCTTATGCTTTTGG        | $\Delta$ fabT-Janus Cassette R     |
| Pr1913    | CCAAAAGCATAAGGAAAGGGTCATGGGTAAAGGCTTGAC        | fabT dw F                          |
| Pr1914    | CTGCAAGCCGCGGTTAAGTC                           | fabT dw R                          |
| Pr1915    | GTCAAGCCTTTACCCATGACTTTTCATATCCCTCCTTC         | $\Delta$ fabT R                    |
| Pr1916    | GAAGGAGGGATATGAAAAGTCATGGGTAAAGGCTTGAC         | $\Delta$ fabT F                    |
| Pr1917    | GAGGTTGCAGATGGAAGCTG                           | fabT up F                          |
| Pr1930    | GTTCACTTACACGAGCCCCA                           | psrA F                             |
| Pr1931    | TGTCAAAGTACAGCAAAAACCGT                        | psrA R                             |
| Pr1995    | GAATTATCAAGCGGAAAGAGCAAC                       | 5' non-invertible region in hsdS F |
| Pr1970    | TTCATATATAGGATAAGAGGTTGTTTCGTCTTTG             | IR2.2-2.1 R                        |
| Pr1971    | AAATATCTTTTATTTTTATAACAACCCAATTCATAGGTATA      | IR3.2-3.1 R                        |
| Pr1974    | TCCCAACTTTCTGGTATTTACAAGGTAC                   | IR2.1-2.2 R                        |
| Pr1975    | GTACCTTGTGAAATACCAGAAAGTTGGGA                  | $\Delta$ psrA::JC dw R             |
| Pr1991    | GTTAATTGGTAAAAAATAACAGGTGGTCAAACCTG            | IR3 F                              |
| Pr1992    | GTGGAGCTGTTGTGAAAACTTGAATAG                    | IR1.2-1.1 F                        |
| Pr1994    | CCATAATCACAAAATAGCAGGTAGTCAG                   | $\Delta$ psrA::JC up F             |
| Pr2001    | CCACGAAATATCTCAGTTTCC                          | 5' non-invertible region in hsdS R |
| Pr2002    | CTTATCAGTGAAGGAAAAATCAAACG                     | IR1 F                              |
| Pr2003    | GTAAAGTATCCAAAACAATAAATGCTG                    | IR1R R                             |

|        |                                                                                                     |                                               |
|--------|-----------------------------------------------------------------------------------------------------|-----------------------------------------------|
| Pr2004 | CATCCATCGTGTATTGCACCATCAAC                                                                          | IR1F R                                        |
| Pr2005 | AAAGTTGCTTCTATTCTTATCCCTCTCCC                                                                       | IR1.1-1.2 F                                   |
| Pr2006 | TGAGTGGCAGGAATATCCAATATGGC                                                                          | IR3R R                                        |
| Pr2007 | ATCCACCAGCCACAACACCATCATAG                                                                          | IR3F R                                        |
| Pr2008 | GCTTTCTTCAAATGTTAATTCAAATC                                                                          | $\Delta$ psrA F                               |
| Pr2009 | GATTTTGAATTAACATTTGAAGAAAGC                                                                         | $\Delta$ psrA R                               |
| Pr2010 | AGGAGTTTTTCAGCATTATCCTCTAGAGTCAATTTGCGACTACAAGG                                                     | $\Delta$ psrA::JC up R                        |
| Pr2011 | CCTTGTAGTCGCAAATTGACTCTAGAGGATAATGCTGAAAACCTCT                                                      | $\Delta$ psrA-Janus Cassette F                |
| Pr2012 | CGTGCGGTGGAATTTCTATCCTCGAGCCTTTCCTTATGCTTTTGGAC                                                     | $\Delta$ psrA-Janus Cassette R                |
| Pr2013 | GTCCAAAAGCATAAGGAAAGGCTCGAGGATAGAAATTCCACCGCA<br>CG                                                 | $\Delta$ psrA::JC dw F                        |
| Pr2034 | TTATTTATCATCATCATCTTTATAATCTTTATCATCATCATCTTTATAA<br>GGTTCCGCTGGCTCCGCTGCTGGTTCTGGCGATTATAAAGATGATG |                                               |
| Pr2035 | ATGATAAAGATTATAAAGATGATGATGATAAAGATTATAAAGATGA<br>TGATGATAAATAATGGCTTTTGCAAAAATAAGT                 | Construction of pPEPZ-<br>Plac-RBS-fabT-FLAG3 |
| Pr2043 | TTGAGATCTGAAGAAGGAGGGATATGAAAA                                                                      |                                               |
| Pr2044 | CCGCTCGAGAAAAGCCATTATTTATCATC                                                                       |                                               |
| Pr2062 | GCGTCTTGTTACGCCAAGTC                                                                                | hsdM F                                        |
| Pr2063 | TCTCCTGAGTCCCAGCATT                                                                                 | hsdM R                                        |
| Pr2066 | ACTCCTTTGAACCTTCGGCA                                                                                | adcAll F                                      |
| Pr2067 | CATCCCCTGCTTCCACATCC                                                                                | adcAll R                                      |
